# Supplementary material for: Prevalence and correlates of depressive symptoms among Chinese patients with cataracts treated in tertiary general hospitals
Source: PeerJ. 2020 Jun 16;8:e9397. doi: 10.7717/peerj.9397 (PMC7304416; doi:10.7717/peerj.9397)
Supplement: Supplemental Information 2 [file peerj-08-9397-s002.xlsx]

## Sheet: Sheet1
Variables	Explanation	Coding
id	patient id
department	clinical settings of patients	1=outpatient; 2=inpatient
gender	gender	1=male; 2=female
agegroup	age group	1=20-54; 2=55-64; 3=65-74; 4=75+
education	education level	1=primary school and below; 2=middle school and above
marrital	marrital status	1=married; 2=others
residence	current residence place	1=urban; 2=rural; 3=urban-rural fringe
economic	self-rated family economic status	1=moderate and good; 2=poor
hypertension	having hypertension	1=no; 2=yes
dm	Having diabetes mellitus	1=no; 2=yes
subtype	subtype of cataract	1=cortical; 2=nuclear; 3=posterior subcapsular; 4=mixed
eye	affected eyes	1=unilateral; 2=bilateral
stage	treatment stage	1=before surgery; 2=after surgery
depress	depressive symptoms	1=yes; 0=no
